# Supplementary material
Source: PubMed Central journal article supplement (PMC4141533)
Supplement: NIHMS485996-supplement-1.pdf [file NIHMS485996-supplement-1.pdf]

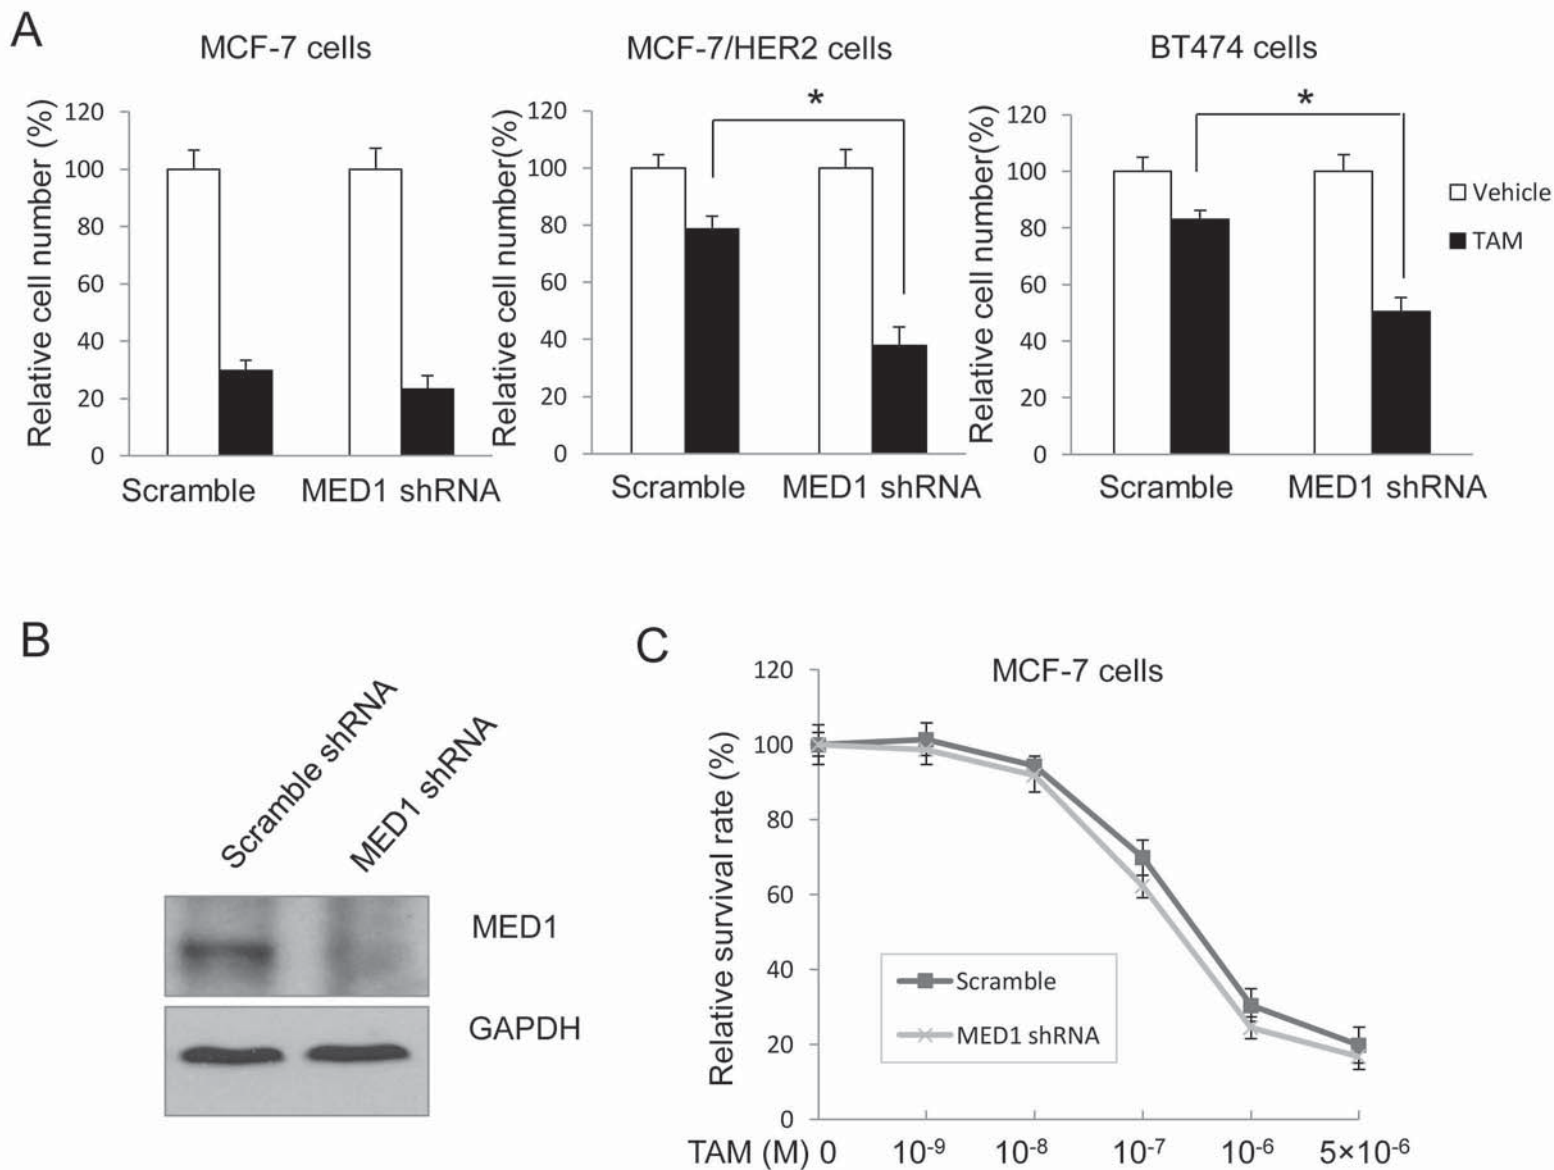

**Fig S1. Knockdown of MED1 affects tamoxifen sensitiveness of HER2-overexpressed cells.** A. MCF-7, MCF-7/HER2 and BT474 cells were first treated with control scramble or MED1 shRNA. The cells were then cultured in regular DMEM medium with indicated amount of TAM for 7 days and cell number counted using a hemocytometer. B. Western blot showing MED1 levels in MCF-7 cells after control scramble or MED1 shRNA treatments. C. Control or MED1 shRNA knockdown MCF-7 cells were cultured in regular DMEM medium 10% fetal bovine serum and treated with vehicle or indicated amount of 4-hydroxytamoxifen (TAM) for 7 days. Cells were then harvested and assessed for cell proliferation by MTT assays. The cell numbers of the vehicle treated group was set as 100%. (\*:  $P < 0.05$ ).
