# Supplementary material
Source: PubMed Central journal article supplement (PMC4141533)
Supplement: NIHMS485996-supplement-2.pdf [file NIHMS485996-supplement-2.pdf]

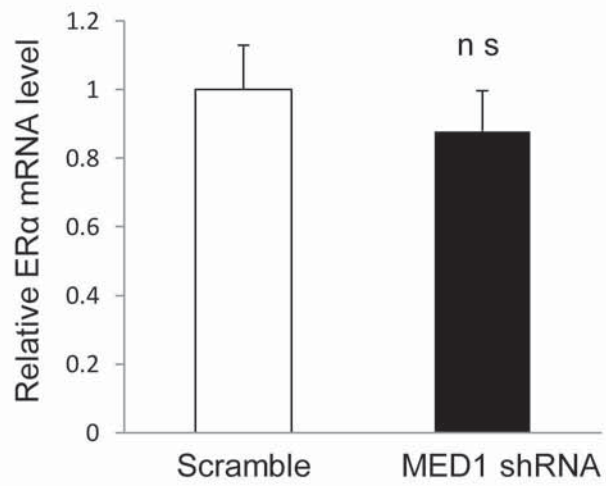

**Fig S2. MED1 is not required for the expression of ER $\alpha$  mRNA.** ER $\alpha$  mRNA levels in control or MED1 shRNA treated MCF-7/HER2 cells were determined by real-time RT-PCR after normalization to that of GAPDH. (ns: no significance).
