# Supplementary material
Source: PubMed Central journal article supplement (PMC4141533)
Supplement: NIHMS485996-supplement-3.pdf [file NIHMS485996-supplement-3.pdf]

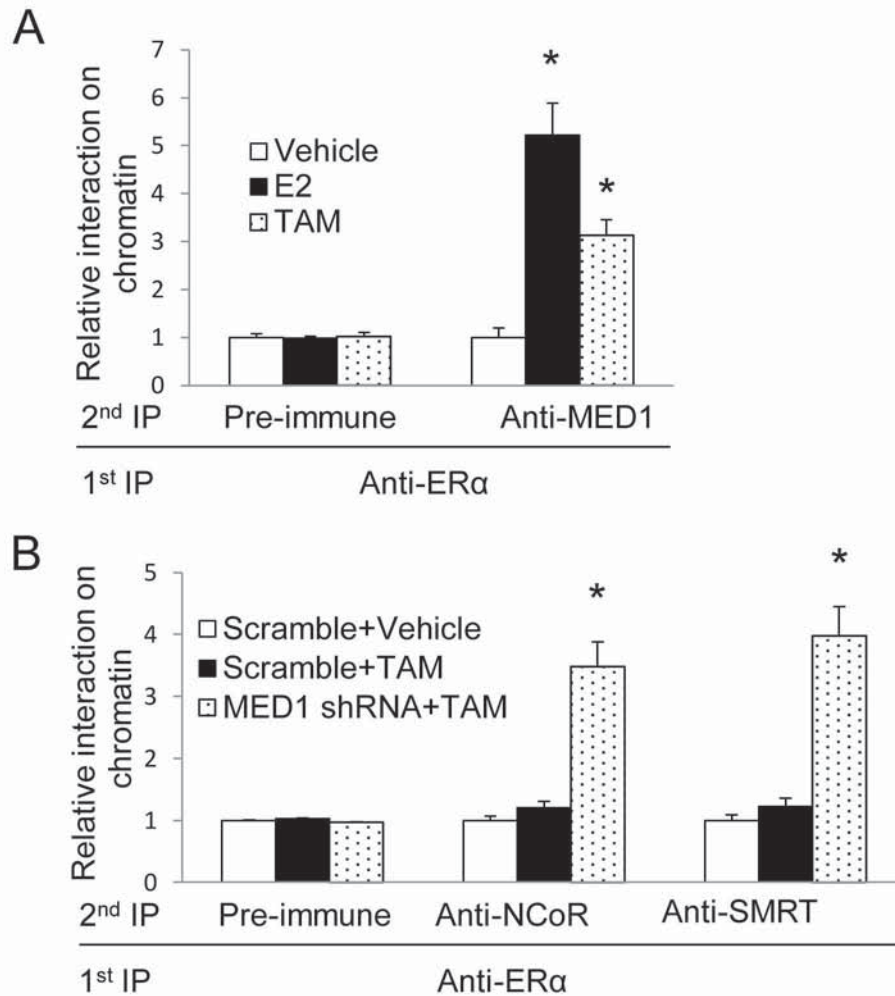

**Fig S3. MED1 and NCoRs exist with ER $\alpha$  on the same TFF1 promoter in MCF-7/HER2 cells**  
 A. MCF-7/HER2 cells were treated with 100nM 17 $\beta$ -estradiol (E2) or 1 $\mu$ M 4-hydroxytamoxifen (TAM) for 45min and harvested for ChIP-re-ChIP assays. In brief, cross-linked protein-DNA complexes were eluted from primary immunoprecipitates (anti-ER $\alpha$ ) by incubation with 10 mM dithiothreitol (DTT) for 30 min at 37°C. The elutes were diluted 1:50 in dilution buffer and then subjected to immunoprecipitation with the second antibodies (anti-MED1). Immunoprecipitated DNA corresponding to the TFF1 promoter region were amplified and quantified by real-time PCR  
 B. ChIP-re-ChIP assays using indicated antibodies were carried out in control scramble or MED1 shRNA treated MCF-7/HER2 cells as in (A). (\*: P < 0.05).
