# Supplementary material
Source: PubMed Central journal article supplement (PMC4141533)
Supplement: NIHMS485996-supplement-4.pdf [file NIHMS485996-supplement-4.pdf]

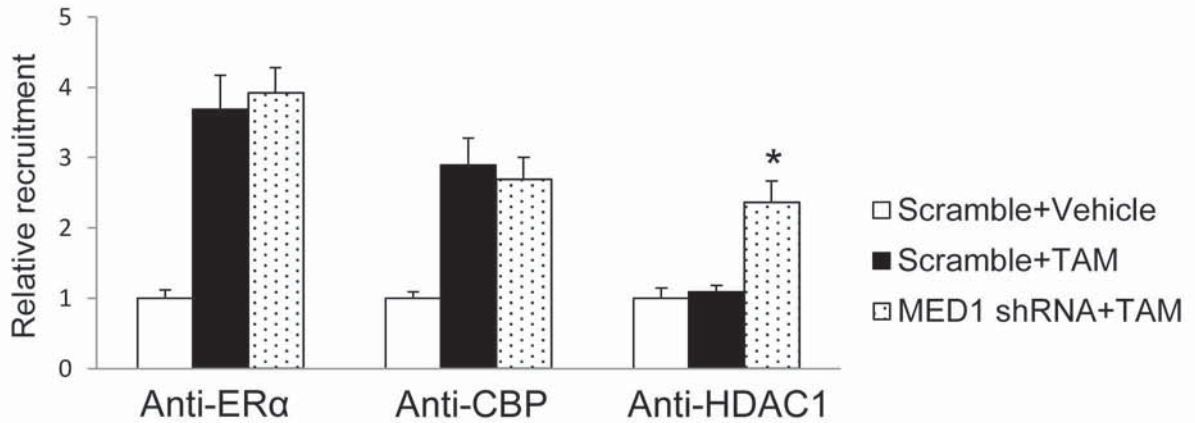

**Fig S4. Knockdown of MED1 enhances HDAC1 occupancy on TFF1 promoter in MCF-7/HER2 cells.** ChIP assays using ER $\alpha$ , CBP and HDAC1 antibodies were carried out in control scramble or MED1 shRNA treated MCF-7/HER2 cells. Immunoprecipitated DNA corresponding to the TFF1 promoter region were amplified and quantified by real-time PCR. (\*: P< 0.05).
