# Supplementary material
Source: PubMed Central journal article supplement (PMC4141533)
Supplement: NIHMS485996-supplement-5.pdf [file NIHMS485996-supplement-5.pdf]

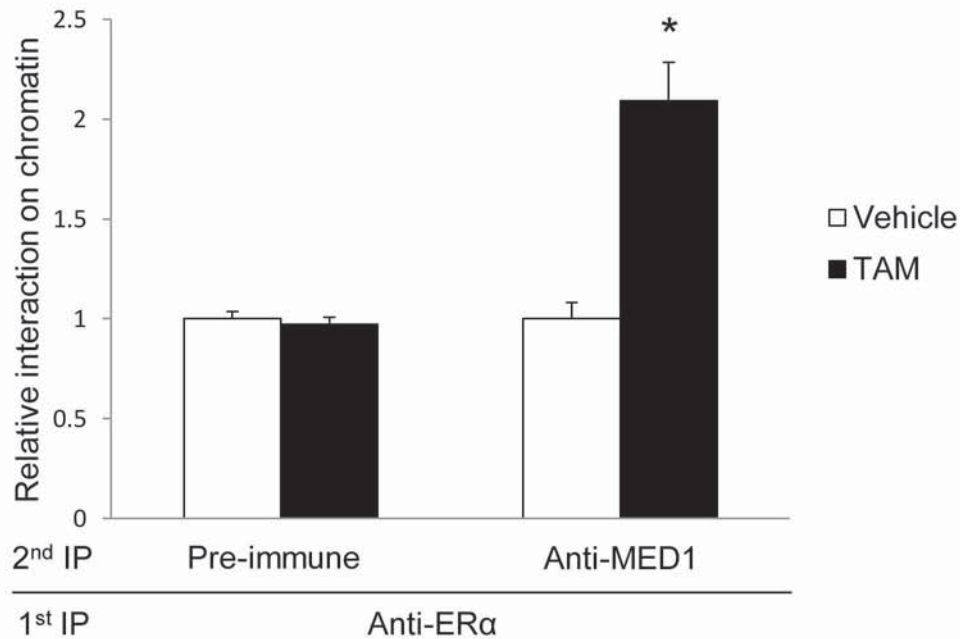

**Fig S5. ER $\alpha$  and MED1 co-localize on the ER $\alpha$  binding site of the HER2 gene.** BT474 cells were treated with vehicle or 1 $\mu$ M 4-hydroxytamoxifen (TAM) for 45min and harvested for Re-ChIP assay using anti-MED1 antibodies followed by anti-ER $\alpha$  antibodies. Immunoprecipitated DNA corresponding to ER binding site of HER2 gene were amplified and quantified by real-time PCR. (\*: P< 0.05).
